# Supplementary material
Source: ML conference proceedings conference paper supplement (https://openreview.net/forum?id=LJ4CYEagg3)

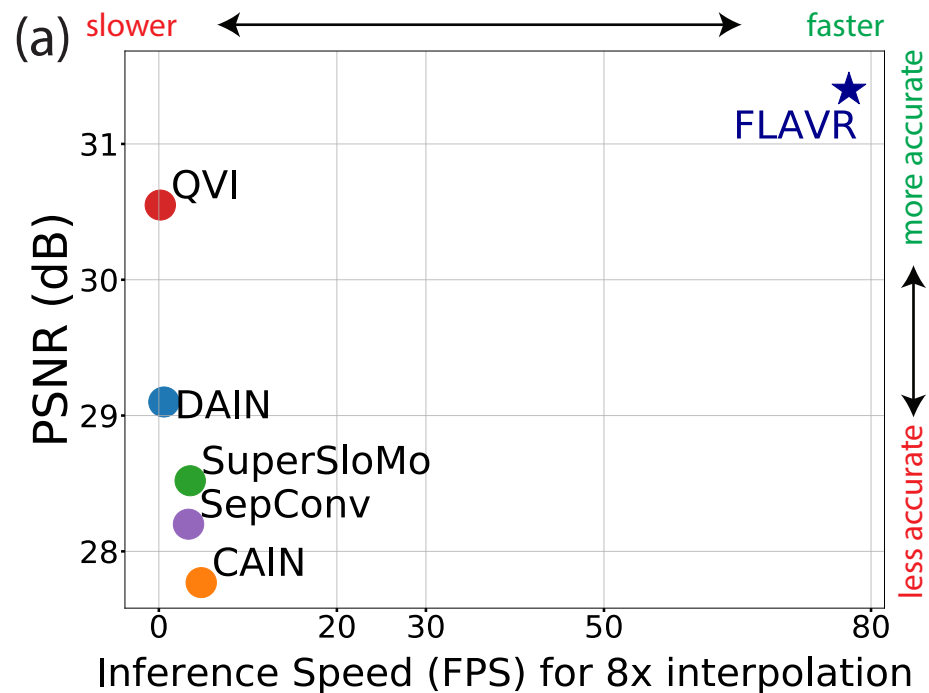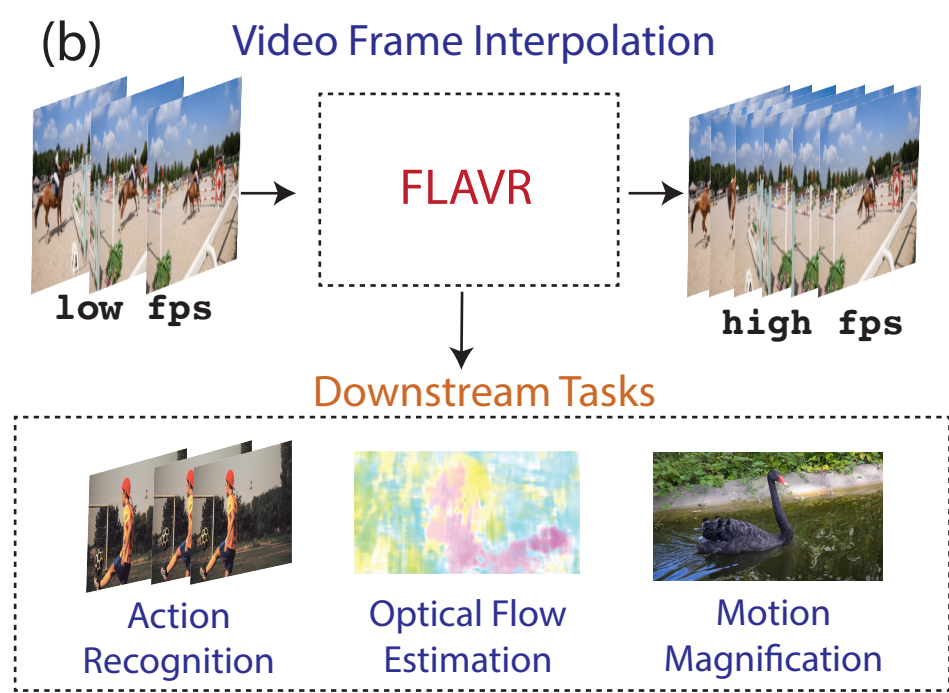

Supplement: supplementary_material [file attachment]

(a) Multi-Stage Architecture

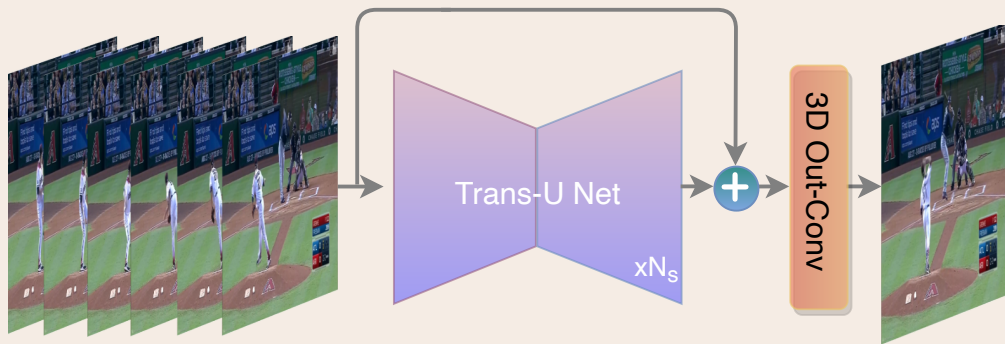

(c) MSA

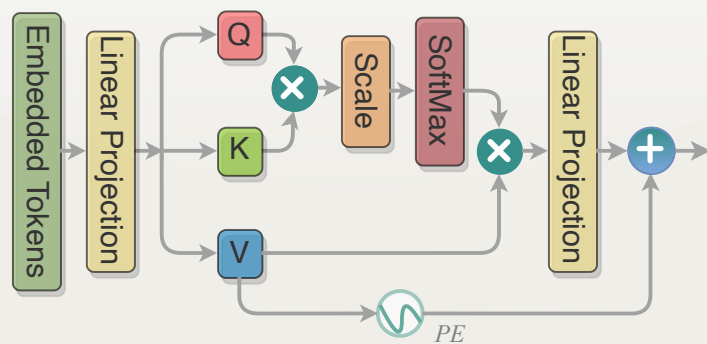

(e) FFN

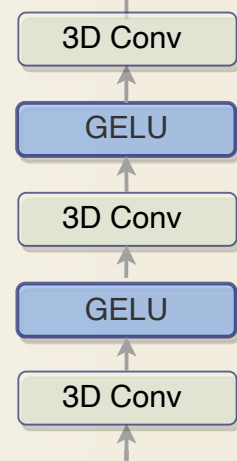

(b) Multi-Scale Transformer

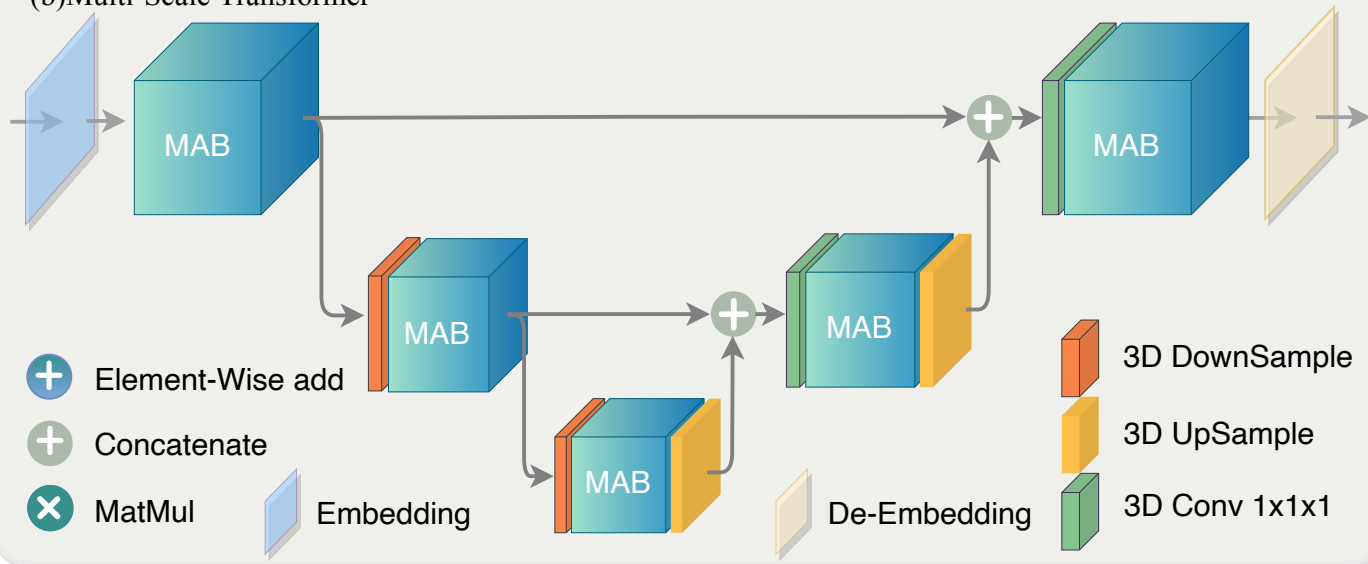

(d) G-MAB

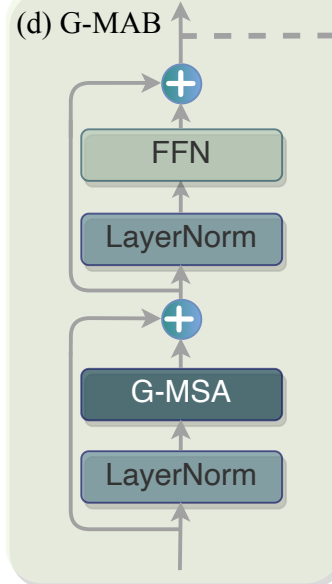

(f) SC-MAB

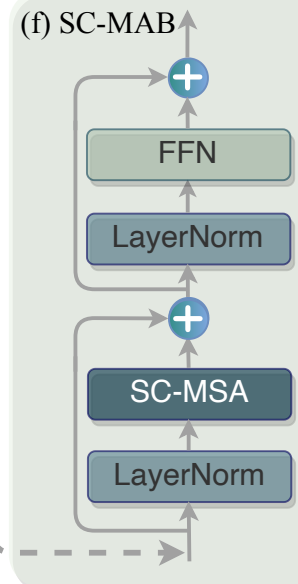

Supplement: supplementary_material [file attachment]

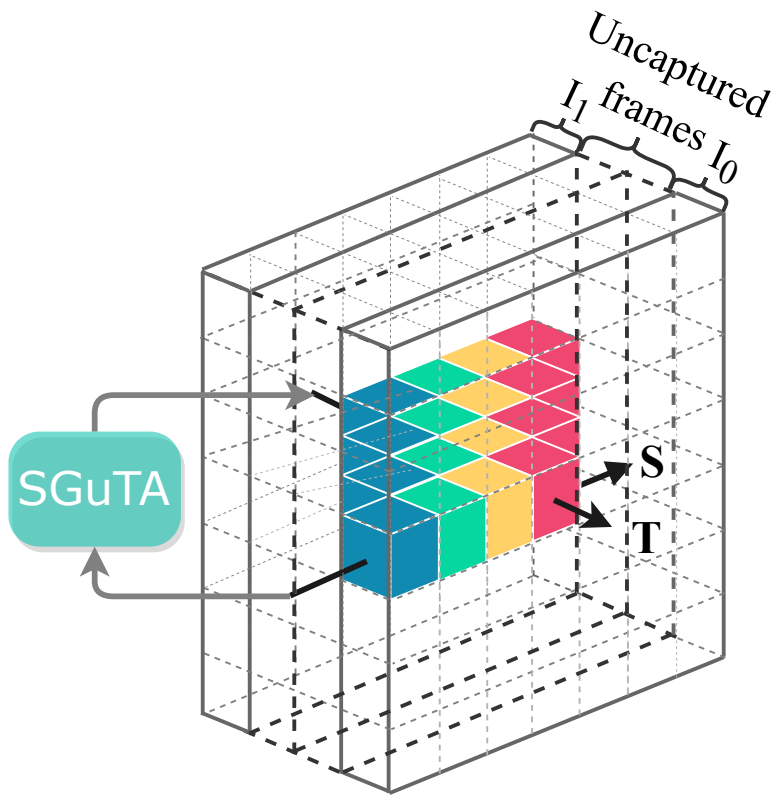

(a)

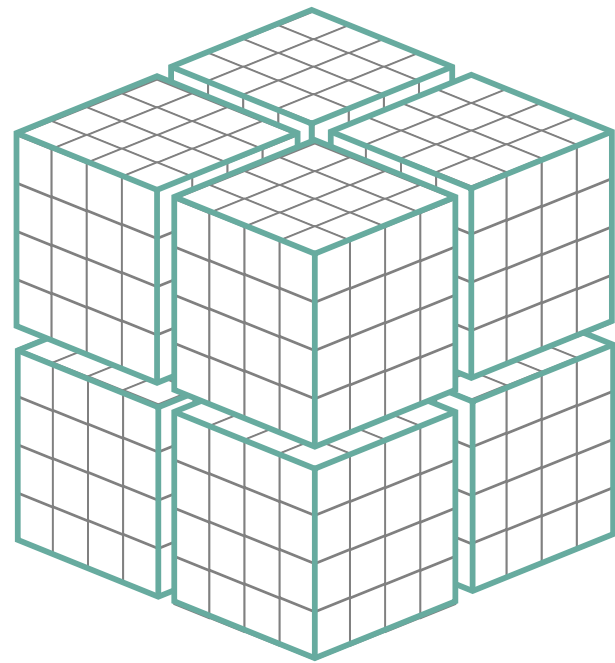

(b)

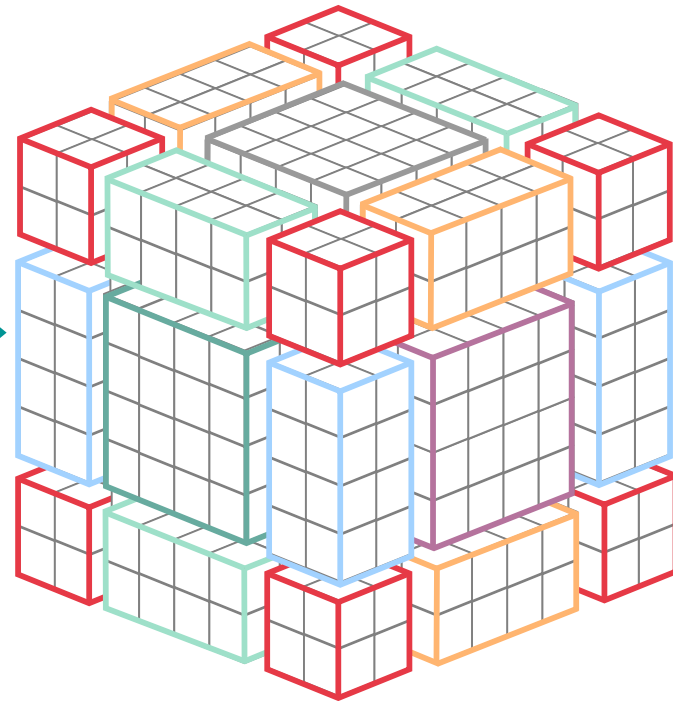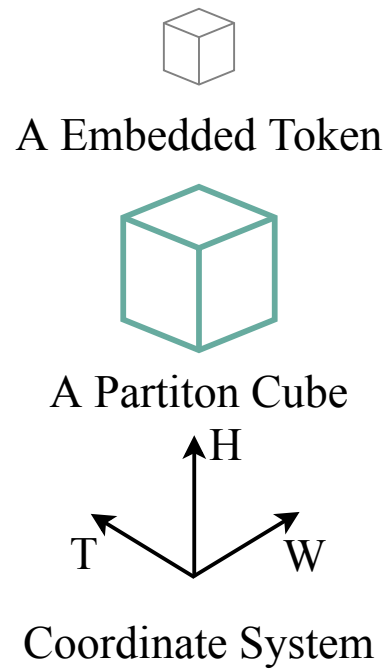

Supplement: supplementary_material [file attachment]
